# Supplementary material
Source: PubMed Central journal article supplement (PMC2634919)
Supplement: 0807265105_0807265105SI.pdf [file 0807265105_0807265105SI.pdf]

# Supporting Information

Li *et al.* 10.1073/pnas.0807265105

## SI Materials and Methods

**Confocal Microscopy.** Approximately  $1 \times 10^5$  primary thioglycolate-elicited macrophages from RNaseL<sup>-/-</sup> mice were plated into each chamber of glass bottomed, 8-well chamber slides (Nunc). Cells were infected with BA spores at a MOI of  $\approx 5$  at 37°C for 5 h, then washed with PBS, and fixed with 4% *p*-formaldehyde for 12 min at room temperature. Cells were blocked and permeabilized for 30 min with PBST (PBS, 1% BSA, 1% normal donkey serum, 0.3% Triton X-100) at room temperature. CatE was visualized by immunofluorescence using polyclonal antibody against the C terminus of mouse Cathepsin E (AbCam), followed by Cy3-conjugated donkey anti-rabbit IgG (Jackson). CD11b was detected using monoclonal IgG2b antibody raised against mouse CD11b (Integrin  $\alpha$ M, Mac-1 $\alpha$ ; eBiosciences), followed by a

secondary Cy-5- conjugated donkey anti-rat IgG (Jackson). BA spores were visualized by addition of a human monoclonal antibody against protective antigen selected for its toxin-neutralizing activity (1), followed by Alexa-Fluor 488 goat anti-human IgG (Molecular Probes). Nucleic acid was detected using DAPI (4',6'-diamidino-2-phenylindole) stain. Coverslips were mounted on slides using a DABCO-based anti-fading fluorescent mounting medium and viewed with an Olympus FluoView 500 confocal microscope (60x, NA 1.4 objective) fitted with standard excitation and emission filters for the visualization of UV, Cy2, Cy3, and Cy5.

**RNase-L-Mediated rRNA Cleavage.** rRNA cleavage was analyzed by formaldehyde-agarose gel electrophoresis of total RNA, and RNA was detected by ethidium bromide staining.

1. Vitale L, *et al.* (2006) Prophylaxis and therapy of inhalational anthrax by a novel monoclonal antibody to protective antigen that mimics vaccine-induced immunity. *Infect Immun* 74:5840–5847.

2. Li XL, *et al.* (2007) Post-transcriptional regulation of RNase-L expression is mediated by the 3'-untranslated region of its mRNA. *J Biol Chem* 282:7950–7960.

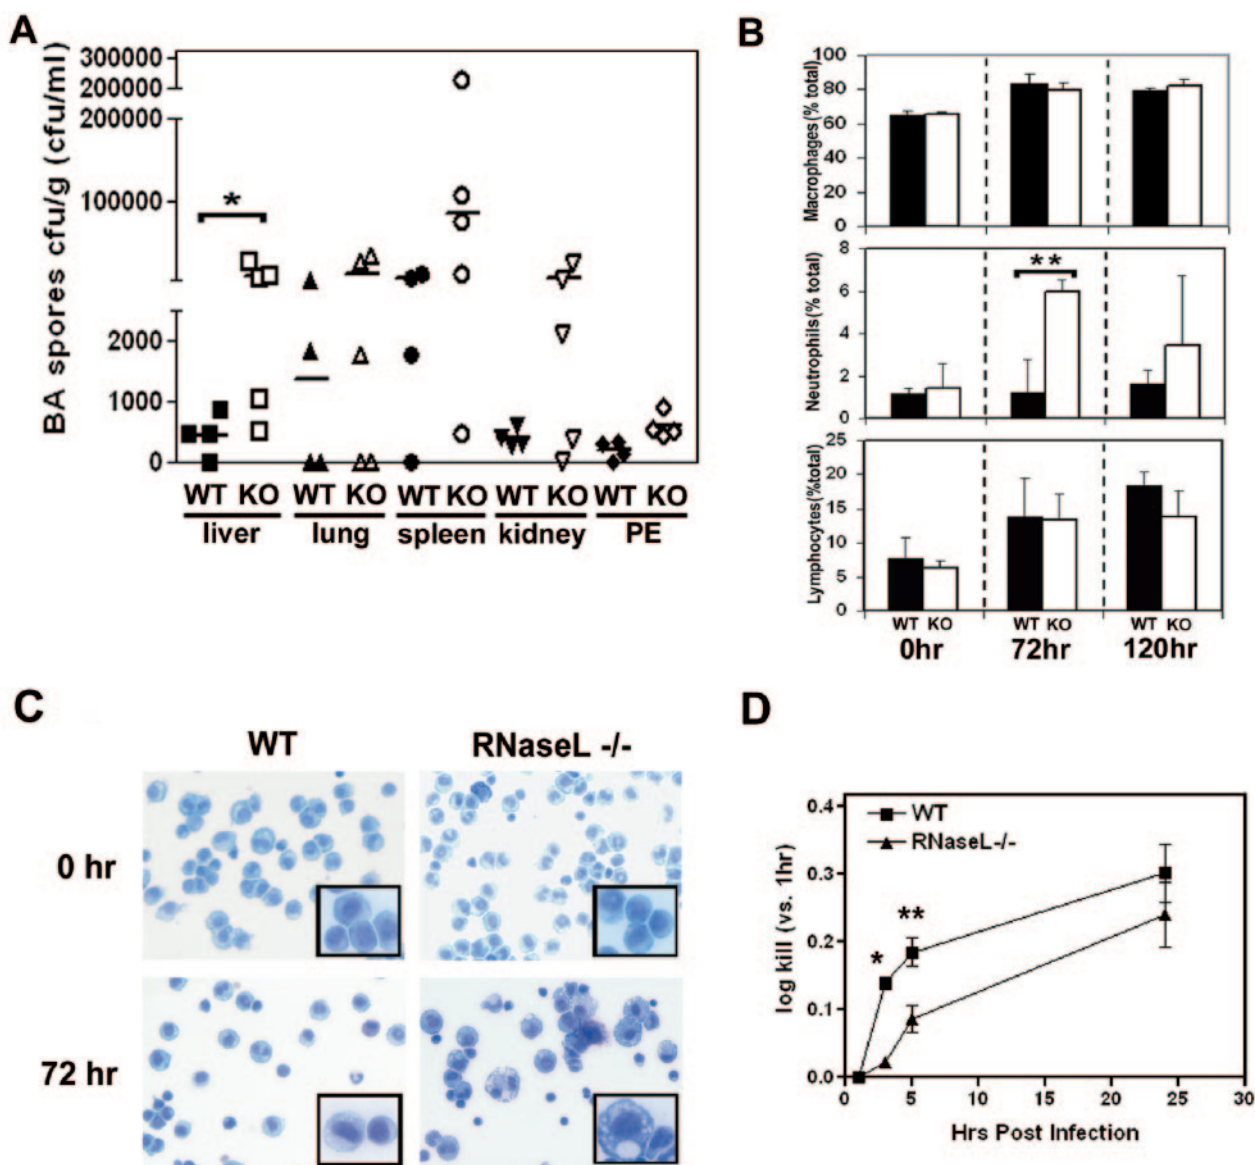

**Fig. S1.** Immune response to BA is impaired in RNase-*L*<sup>-/-</sup> mice. (A) Mice were inoculated with  $4 \times 10^5$  cfu BA Sterne spores and bacterial titers in organs (cfu/g), and peritoneal exudates (PE), and blood (cfu/ml) were determined at 72 hpi. Lines indicate mean values, and (\*) denotes  $P < 0.05$ . (B) Macrophages, neutrophils, and lymphocytes in peritoneal fluid at the indicated hours post BA infection (hpi) are expressed as the average of the percentage of a given cell type in  $\geq 400$  total cells counted/mouse from four independent mice  $\pm$  s.d. (\*) denotes  $P < 0.05$ . (C) At the indicated times following infection with  $4 \times 10^5$  cfu BA Sterne spores i.p., cells in the peritoneal fluid were isolated and stained; representative fields are shown at 200x and 400x (inset) magnification. D. Peritoneal macrophages from RNase-*L*<sup>-/-</sup> and WT mice were infected with BA spores (MOI = 0.2) for the indicated times, and the viable spores were quantified, and expressed as the log reduction in cfu as compared to the 1 h value; (\*) signifies  $P < 0.05$ ; (\*\*) signifies  $P < 0.001$ .

**Relative [RNA]**

**WT** **KO**

**IFN $\beta$**

**IL-1 $\beta$**

**TNF $\alpha$**

**0 1 3**

**CpG (hrs)**

Li et al. [www.pnas.org/cgi/content/short/0807265105](http://www.pnas.org/cgi/content/short/0807265105)

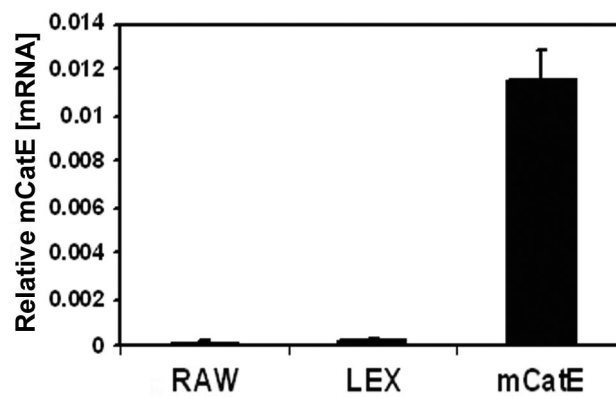

**Fig. S4.** CatE expression in parental RAW264.7 cells, and following stable transduction with lentiviral vector (LEX3) or catE construct, was measured by qRT-PCR.

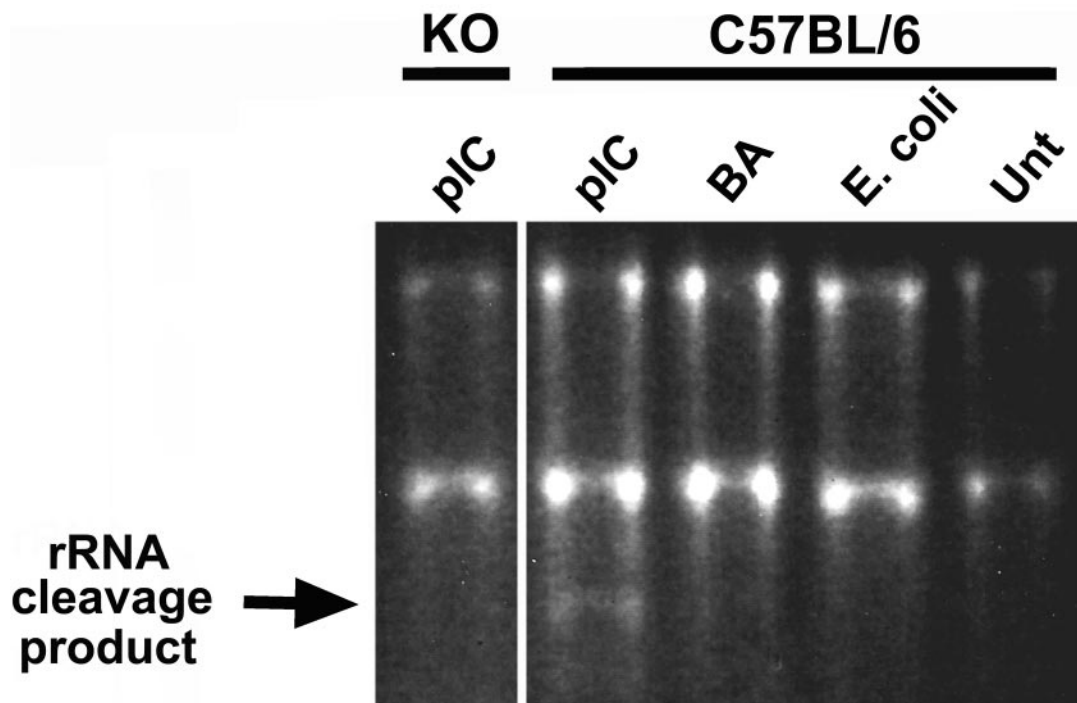

**Fig. S5.** RNase-L mediated rRNA cleavage is not detectable following bacterial infection. Total RNA isolated from WT (C57BL/6) or RNase-L<sup>-/-</sup> (KO) macrophages following infection with *E. coli* (20 h, MOI = 5) or BA (20 h, MOI = 2) as indicated. Treatment with dsRNA (8 h, 25  $\mu$ g/ml) was used to activate OAS as a positive control for rRNA cleavage; the absence of rRNA cleavage in dsRNA treated RNase-L<sup>-/-</sup> macrophages demonstrated the RNase-L dependence of this activity. Note that the space between this lane and the remainder of the gel is to indicate that it was repositioned in the figure to permit a direct comparison of rRNA cleavage in adjacent WT and RNase-L<sup>-/-</sup> macrophage samples. RNA was analyzed (15  $\mu$ g/lane) for rRNA cleavage by electrophoresis on formaldehyde-agarose gels; RNA was stained with ethidium bromide, and visualized with UV light.

**Table S1. Differential induction of nonimmune genes**

| Gene title                                                         | Symbol   | KO unt vs.<br>WT unt | KO 8 h vs.<br>WT 8 h | KO 8 h vs.<br>KO unt | WT 8 h vs.<br>WT unt | P value | KO vs. WT fold<br>induction at 8 hpi |
|--------------------------------------------------------------------|----------|----------------------|----------------------|----------------------|----------------------|---------|--------------------------------------|
| MIT, microtubule interacting and transport,<br>domain containing 1 | Mitd1    | 1.01                 | −2.13                | 1.95                 | 4.2                  | < 0.001 | −2.16                                |
| BAH domain and coiled-coil containing 1                            | Bahcc1   | 1.01                 | −2.36                | 1.56                 | 3.73                 | < 0.001 | −2.39                                |
| Prostaglandin-endoperoxide synthase 2                              | Ptgs2    | 1.16                 | −1.74                | 2.53                 | 5.1                  | 0.001   | −2.01                                |
| Spindle assembly 6 homolog ( <i>C. elegans</i> )                   | Sass6    | 1.05                 | −1.84                | 1.75                 | 3.39                 | 0.001   | −1.93                                |
| EGL nine homolog 3 ( <i>C. elegans</i> )                           | Egln3    | −1.68                | 1.13                 | −1.51                | −2.87                | 0.004   | 1.91                                 |
| serine (or cysteine) peptidase inhibitor,<br>clade B, member 2     | Serpinb2 | 1.84                 | −1.06                | −2.53                | −1.29                | 0.013   | −1.96                                |
| Proteolipid protein 2                                              | Plp2     | 1.15                 | −2.22                | −2.38                | 1.07                 | 0.028   | −2.55                                |
| Phosphoenolpyruvate carboxykinase 2<br>(mitochondrial)             | Pck2     | −1.4                 | 1.51                 | −1.23                | −2.6                 | < 0.001 | 2.11                                 |
| Trichorhinophalangeal syndrome I (human)                           | Trps1    | −1.64                | 1.18                 | 2.17                 | 1.13                 | 0.004   | 1.93                                 |
| Mitogen-activated protein kinase 1                                 | Mapk1    | 1.11                 | −1.83                | −2.35                | −1.16                | 0.016   | −2.03                                |

Differential induction of nonimmune genes at 8 hpi with BA spores of WT and RNase-L<sup>−/−</sup> macrophages; microarray data was filtered as described in Table 1.

**Table S2. Number of probe sets identified as significantly differentially modulated**

| Comparison        | Number of probe sets |
|-------------------|----------------------|
| KO 2 h vs. KO unt | 1691                 |
| KO 8 h vs. KO unt | 469                  |
| WT 2 h vs. WT unt | 936                  |
| WT 8 h vs. WT unt | 755                  |
| KO unt vs. WT unt | 6                    |
| KO 2 h vs. WT 2 h | 0                    |
| KO 8 h vs. WT 8 h | 4                    |
| KO 2 h vs. WT unt | 1657                 |
| KO 8 h vs. WT unt | 567                  |

Microarray analysis results. Pairwise comparisons between treatments of over 45,000 gene fragments (probe sets) produced a total of 2,382 probe sets with a *P* value of less than 0.05 and an absolute ratio of 1.3 for at least one comparison. WT, C57Bl/6; KO, RNase-L<sup>−/−</sup>.

Table S3. mRNA half life (hrs)

|              | WT   | KO   |
|--------------|------|------|
| catE         | 1.3  | 16   |
| TNF $\alpha$ | 0.42 | 0.64 |
| IL-1 $\beta$ | 0.42 | 0.53 |
| TLR3         | 10.7 | 11.2 |
| c-fos        | 0.51 | 0.32 |

RNase-L-dependent regulation of mRNA stability. The half lives of the indicated mRNAs in WT and RNase-L<sup>-/-</sup> macrophages were calculated as described (2).

Mouse

|               |                                                                                       |
|---------------|---------------------------------------------------------------------------------------|
| CatE          | forward; 5' TTGACACCGGTTTCATCCAACCTCT-3',<br>reverse; 5' ATGGATGGAATACTGGGTGTGCCT-3'. |
| LAMP1         | forward; 5' TAGTGCCACATTGAGCATCTCCA-3',<br>reverse; 5' TTCCACAGACCCAAACCTGTCCT-3'.    |
| LAMP2         | forward; 5' AGAAGACCAAACCTCCACCACTGT-3',<br>reverse; 5' AGTTGGAGTTGGAGTGGGTGTTGA-3'.  |
| c-fos         | forward; 5' ATCCTTGGAGCCAGTCAAGAGCAT-3',<br>reverse; 5' TCCCAGTCTGCTGCATAGAAGGAA-3'.  |
| TLR3          | forward; 5' ACCTTTCGCGCTCTTCGTAACCT-3',<br>reverse; 5' AGACCCCTCCAGCAAAGTCTCATTT-3'.  |
| GAPDH         | forward; 5' TGTGATGGGTGTGAACCAACGAGAA-3',<br>reverse; 5' GAGCCCTTCACAATGCCAAAGTT-3'.  |
| IFN- $\beta$  | forward; 5' CACTTGAAGAGCTATTACTGGAGGG-3',<br>reverse; 5' CTCGGACCACCATCCAGG-3'.       |
| IL-1 $\beta$  | forward; 5' TGGAGAGTGTGGATCCCAAGCAAT-3',<br>reverse; 5' TGTCTGTACCACCTGTTGTTCCCA-3'.  |
| TNF- $\alpha$ | forward; 5' AGCCGATGGGTTGTACCTTGCTCA-3',<br>reverse; 5' TGAGATAGCAAATCGGCTGACGGT-3'.  |

Sequences of primers used in this study.
